# Supplementary material for: A silver metal–organic cage with antibacterial activity for wound healing
Source: Royal Society of Chemistry journal article supplement (doi:10.1039/d3ra04013e), 2023-01-01
Supplement: d3ra04013e1.pdf [file d3ra04013e1.pdf]

## Supporting Information

A silver metal organic cage with antibacterial activity for wound healing

Linlin Chen,<sup>a</sup> Jing Cheng<sup>a</sup>, Longjie Wang<sup>b</sup>, Wenwen Fan<sup>b</sup>, Zhixiang Lu<sup>\*c</sup> and Liyan Zheng<sup>\*b</sup>

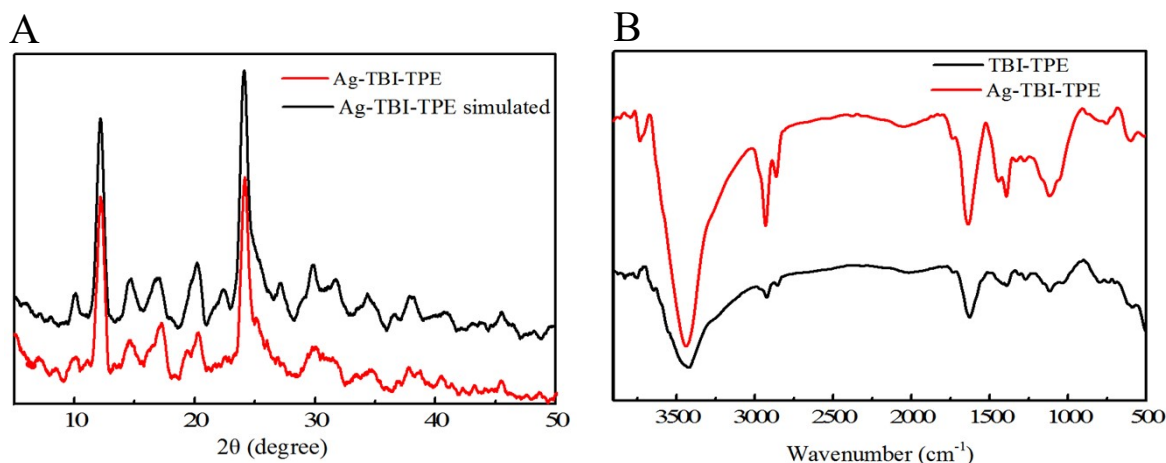

**Figure S1** (A) The PXRD patterns of Ag-TBI-TPE cage. (B) The FTIR spectrum of TBI-TPE and Ag-TBI-TPE cage.

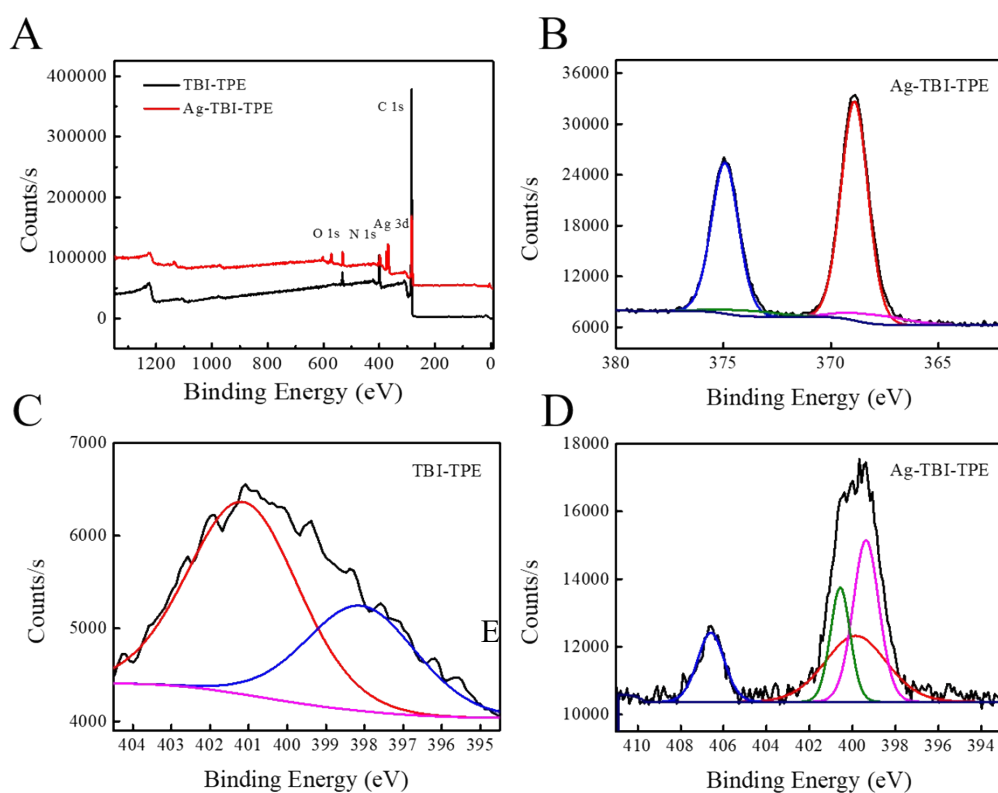

**Figure S2** The XPS spectra of (A) Survey. (B) Ag 3d of Ag-TBI-TPE cage. (C) N 1s of TBI-TPE. (D) N 1s of Ag-TBI-TPE.

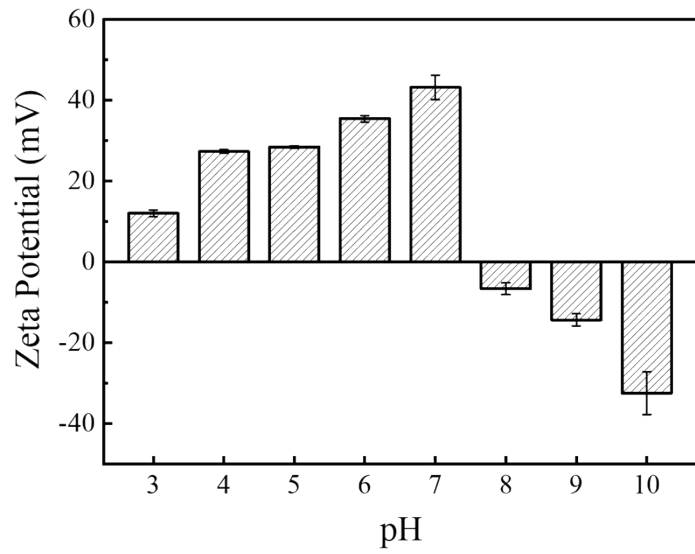

**Figure S3** The zeta potential of Ag-TBI-TPE cage in different pH value. (0.1 mol/L Tris HCl)

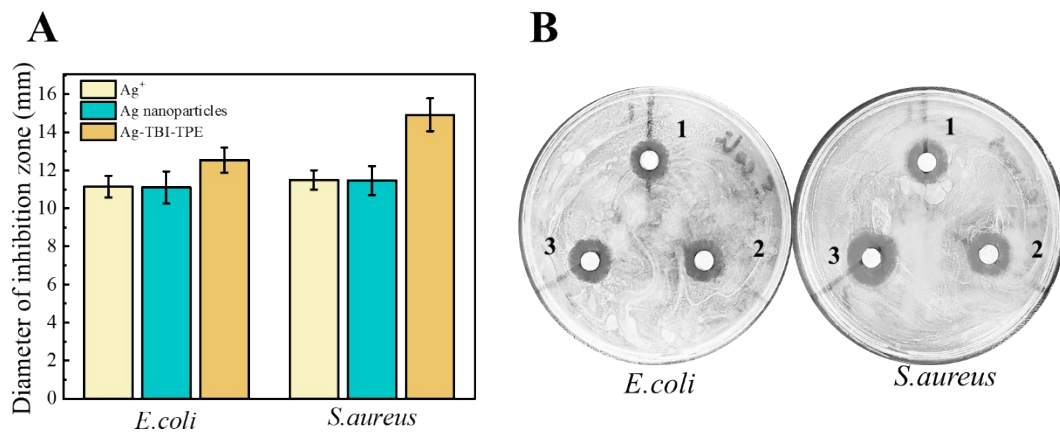

**Figure S4** (A) The diameter of inhibition zone on *E. coli* and *S. aureus*. (B) The antibacterial effect of (1) Ag<sup>+</sup>, (2) Ag nanoparticles and (3) Ag-TBI-TPE cage on *E. coli* and *S. aureus*.

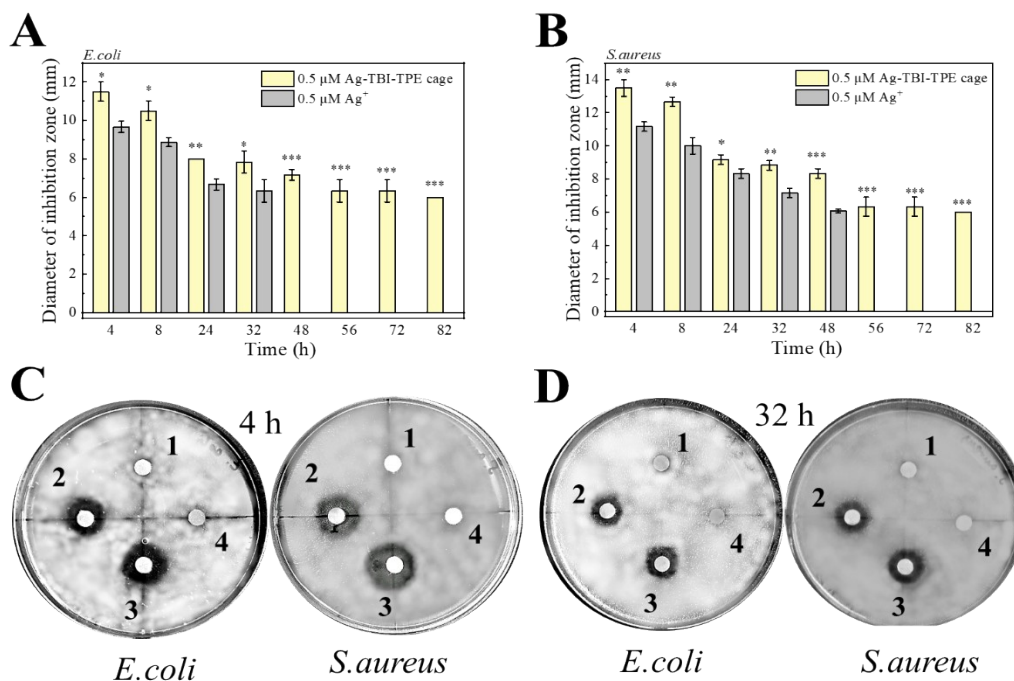

**Fig S5** The antibacterial effect of Ag-TBI-TPE cage and Ag<sup>+</sup> on (A) *E. coli* and (B) *S. aureus* respectively by calculating the diameter of inhibition zone with time. (\* compared with Ag<sup>+</sup>, \* $P < 0.05$ , \*\* $P < 0.01$ , \*\*\* $P < 0.001$ ); The photographic images of the zone of inhibition on *E. coli* and *S. aureus* at (C) 4 hour and (D) 32 hour. (1: DMF : H<sub>2</sub>O (1:100), 2: Ag<sup>+</sup>, 3: Ag-TBI-TPE cage, 4: TBI-TPE)

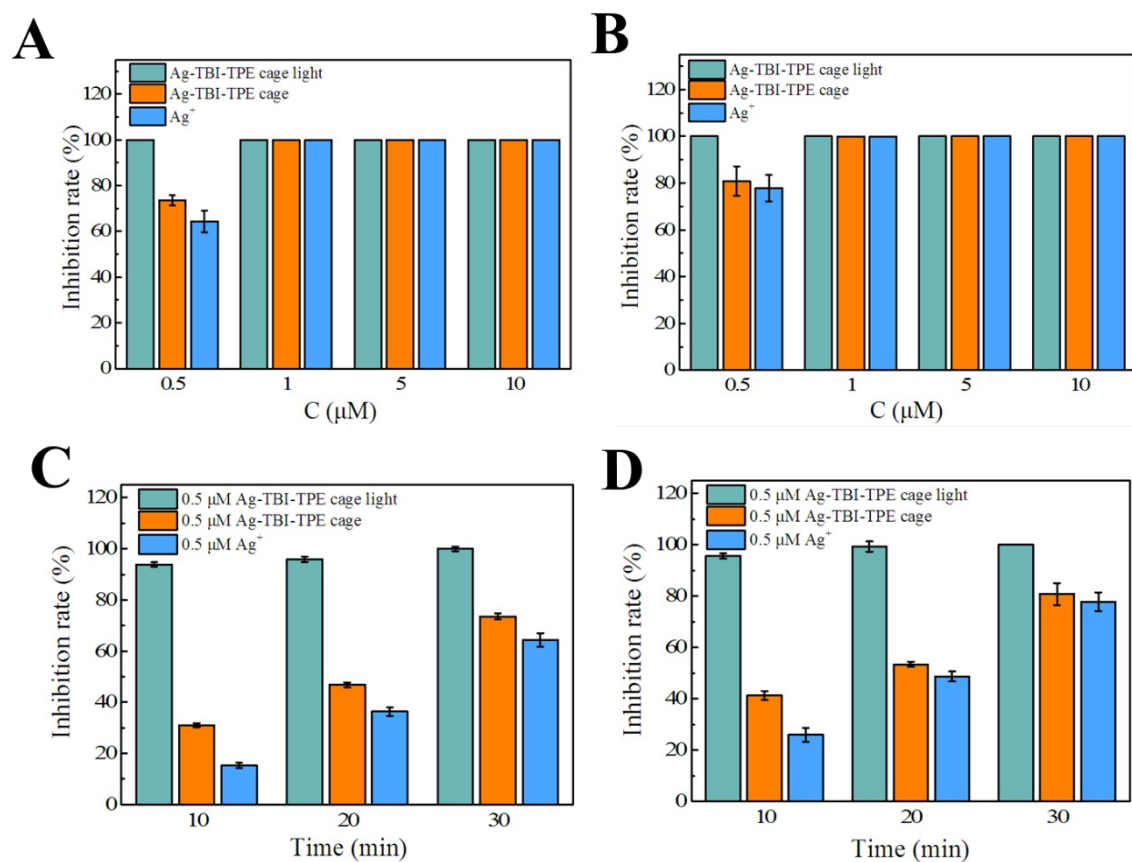

**Figure S6** The concentration-dependent inhibition rate of Ag<sup>+</sup> and Ag-TBI-TPE cage to (A) *E.coli* and (B) *S.aureus* in 30 min. The time-dependent inhibition rate of 0.5 μM Ag<sup>+</sup> and Ag-TBI-TPE cage to (C) *E.coli* and (D) *S.aureus*.

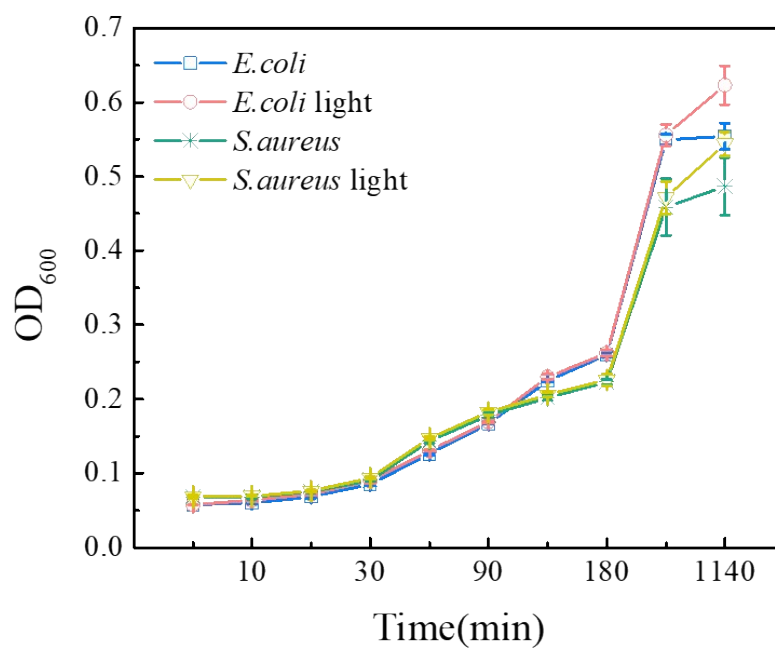

**Figure S7** The UV-Vis absorbance of *E. coli* and *S. aureus* at 600 nm before and after light irradiation.

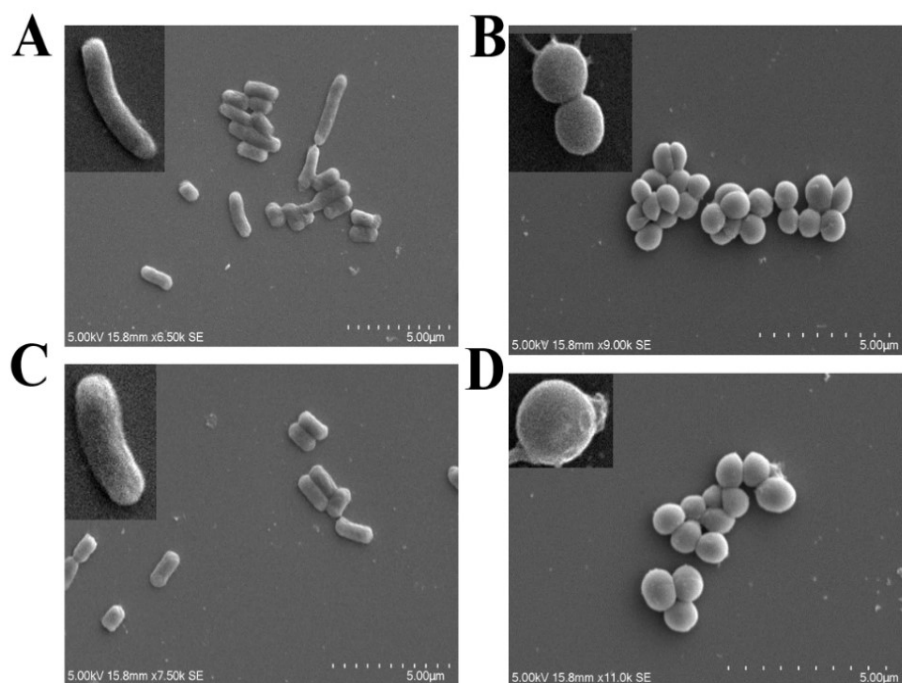

**Figure S8** The SEM images of native (A) *E. coli*, (B) *S. aureus* and after light irradiation (C) *E. coli*, (D) *S. aureus*.

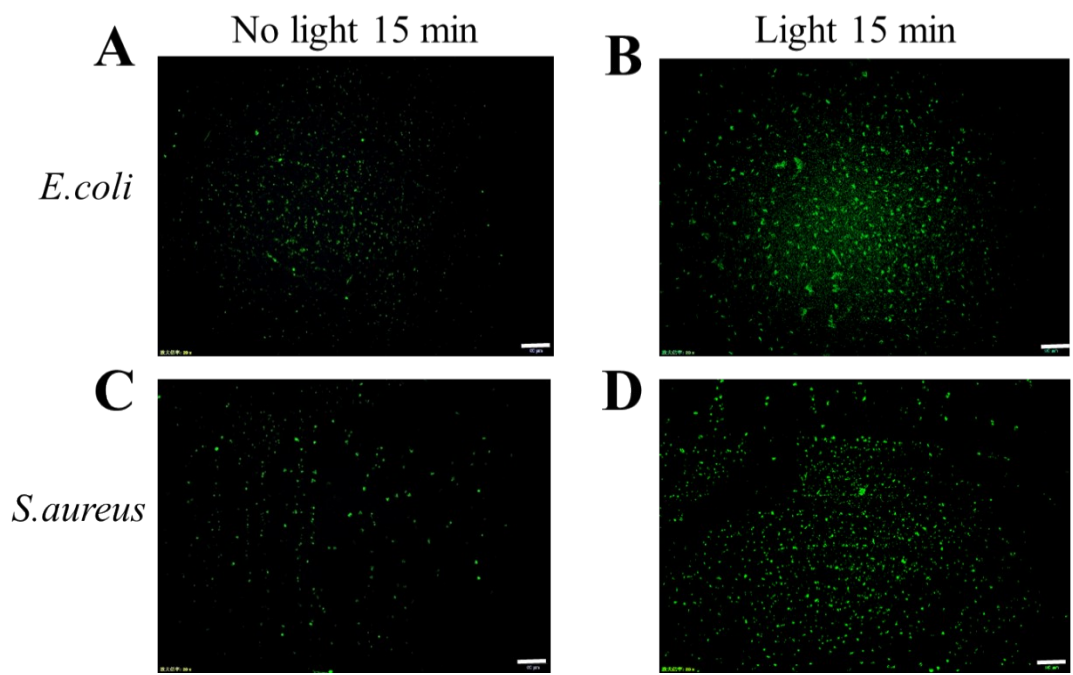

**Figure S9** DCFH-DA assay for measurement of intracellular ROS production: *E.coli* (A) Ag-TBI-TPE cage with *E.coli*; (B) Ag-TBI-TPE cage with *E.coli* after light irradiation. *S.aureus* (C) Ag-TBI-TPE cage with *S.aureus*; (D) Ag-TBI-TPE cage with *S.aureus* after light irradiation. Scale bar: 50  $\mu\text{m}$ .

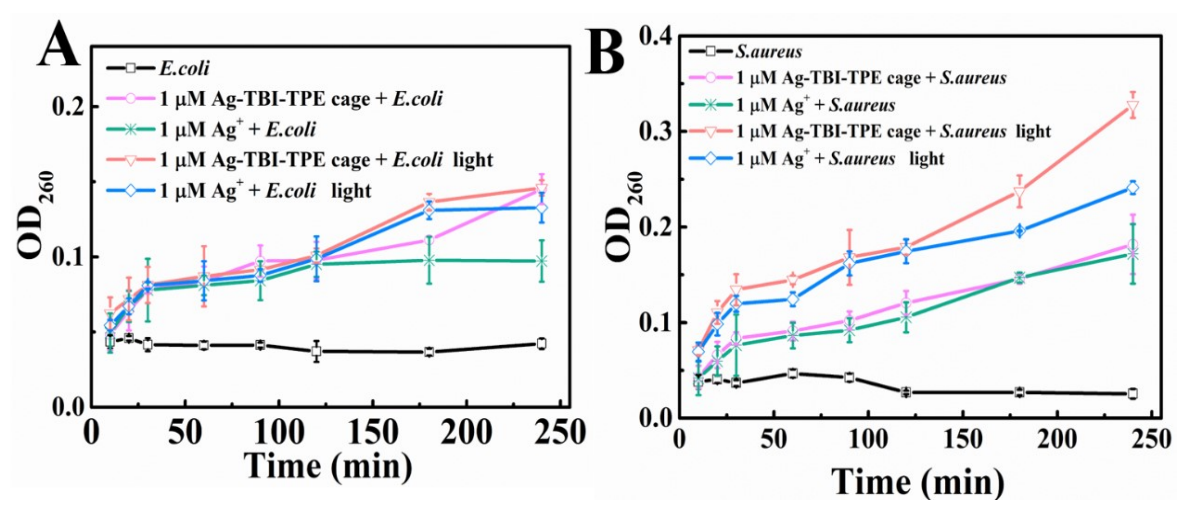

**Figure S10** The characteristic UV adsorption spectrum of DNA at 260nm in different conditions (A) *E.coli* (B) *S.aureus*.

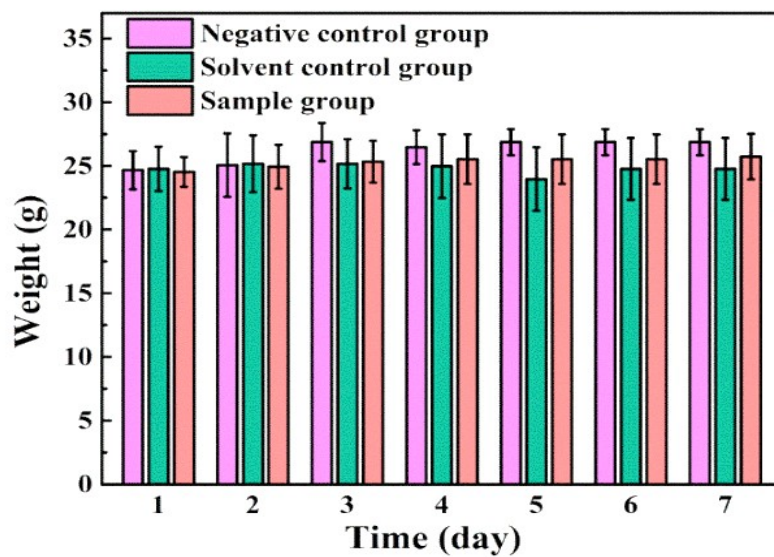

**Figure S11** The acute toxicity test of Ag-TBI-TPE cage was experimented on Kunming mice. n=10

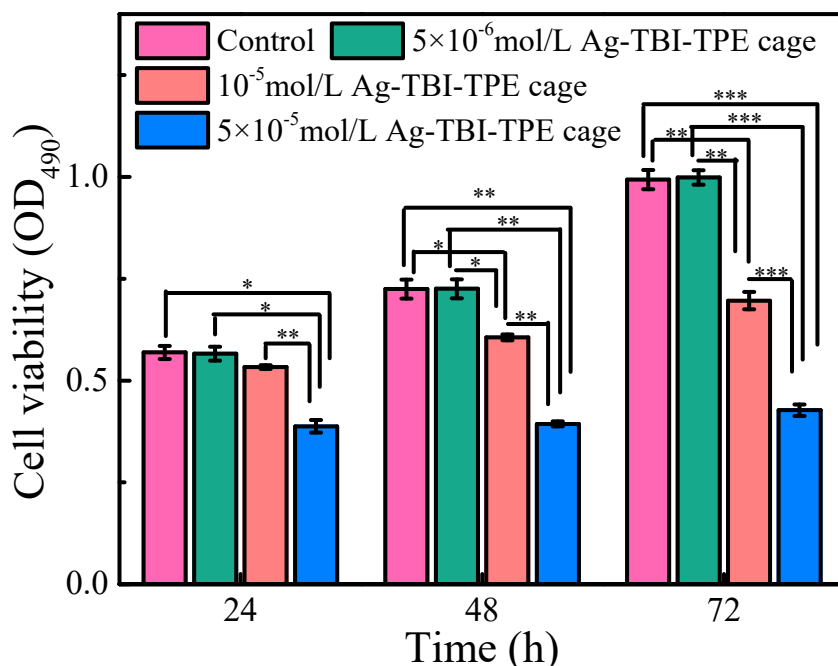

**Figure S12** The MTT experiment was measured by ISO10993-5 standard test (L929 cells) to detect the toxicity of the Ag-TPE to animal cells (n=5, \*p < 0.05, \*\* p < 0.01, \*\*\* p < 0.001).



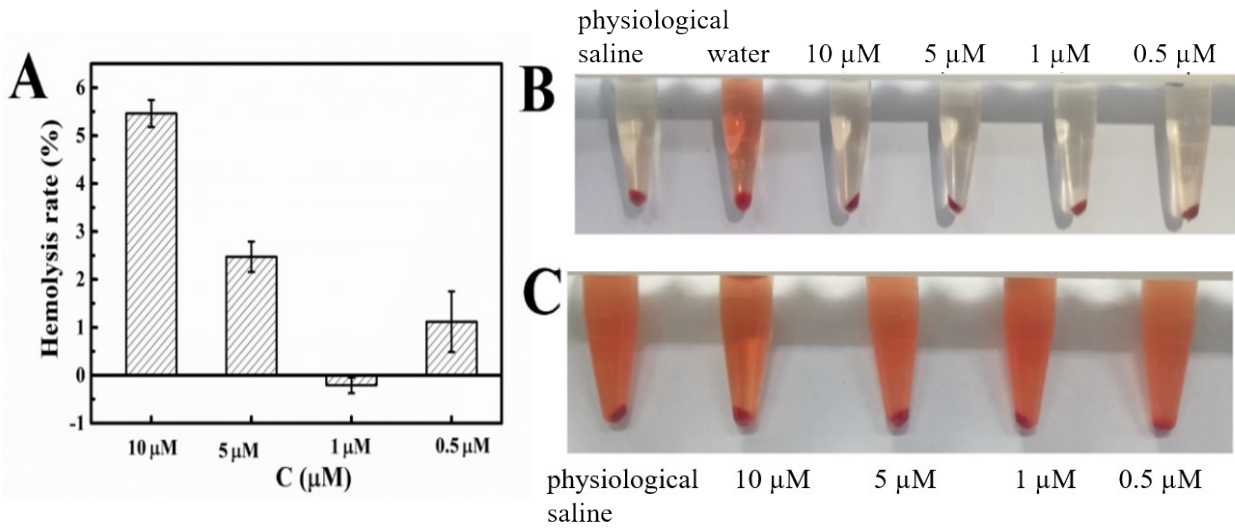

**Figure S13** (A) Hemolysis rate of 0.5 μM -10 μM Ag-TBI-TPE cage. (B) The picture of erythrocytes after treating with water, physiological saline, Ag-TBI-TPE cage. (C) The photographs of physiological saline and Ag-TBI-TPE cage interacted erythrocytes after shaking and placing for a while.

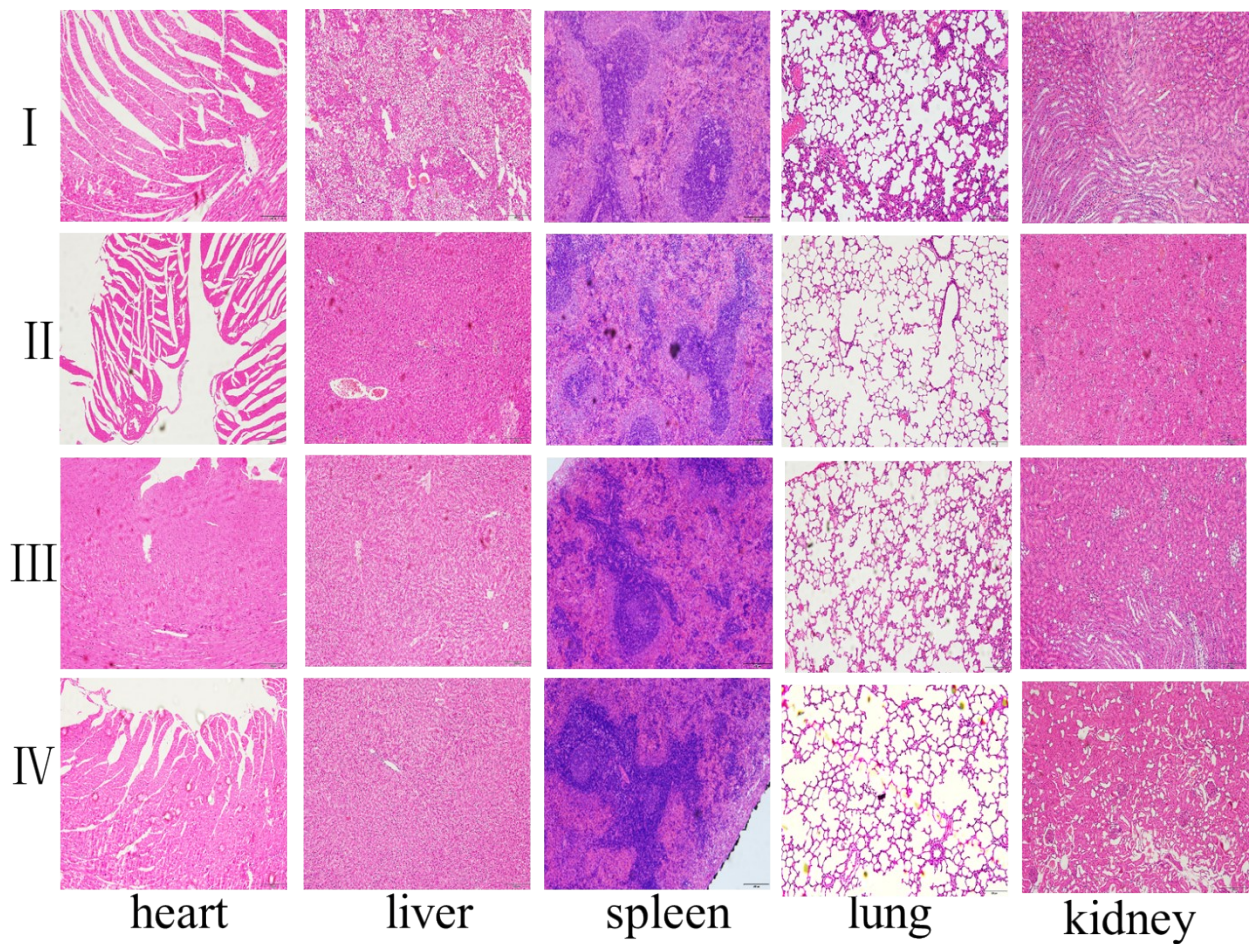

**Figure S14** H&E stained tissue sections shown for the organ tissues (heart, liver, kidney, lung, and spleen) from the infection SD rat treated with Ag-TBI-TPE on day 14 in comparison with the infection SD rat without treatment. (magnification: 100×)
